# Supplementary material for: Hot electron prompted highly efficient photocatalysis based on 3D graphene/non-precious metal nanoparticles
Source: Royal Society of Chemistry journal article supplement (doi:10.1039/d0ra07146c), 2020-01-01
Supplement: d0ra07146c1.pdf [file d0ra07146c1.pdf]

## Electronic Supplementary Information

### Hot electron prompted highly efficient photocatalysis based on 3D graphene/non-precious metal nanoparticles

Suling Zhang<sup>a</sup>, Yanhong Lu<sup>a,\*</sup>, Xingchen Wan<sup>a</sup>, Yaxin Duan<sup>a</sup>, Junlin Gao<sup>a</sup>, Zhen Ge<sup>b</sup>,  
Lei Wei<sup>a</sup>, Yu Chen<sup>a</sup>, Yanfeng Ma<sup>b,\*</sup> and Yongsheng Chen<sup>b,\*</sup>

<sup>a</sup>School of Chemistry & Material Science, Langfang Normal University, Langfang,  
065000, China

<sup>b</sup>The Centre of Nanoscale Science and Technology and Key Laboratory of Functional  
Polymer Materials, State Key Laboratory and Institute of Elemento-Organic  
Chemistry, College of Chemistry, Nankai University, Tianjin, 300071, China

#### Author Information

#### Corresponding Authors

**Yanhong Lu**, Tel/Fax: +86-316-218-8376; Email: luyanhong@lfnu.edu.cn

**Yanfeng Ma**, Tel/Fax: +86-22-2350-0693; Email: yanfengma@nankai.edu.cn

**Yongsheng Chen**, Tel/Fax: +86-22-2350-0693; Email: yschen99@nankai.edu.cn

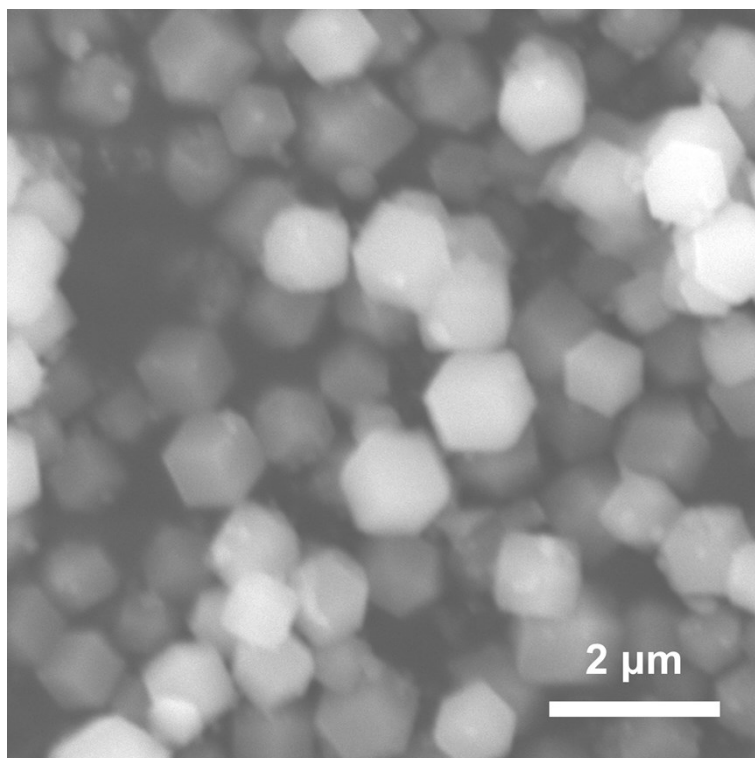

**Figure S1** SEM image of prepared ZIF-67 crystals. The prepared ZIF-67 particles show polyhedral shape with a smooth surface and an average size of approximately 500-1000 nm.

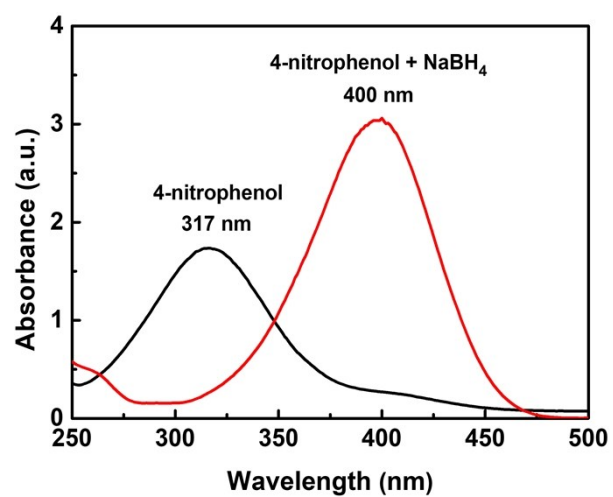

**Figure S2** UV-vis spectra of 4-nitrophenol before (black line) and after (red line) adding the reducing agent of NaBH<sub>4</sub>.

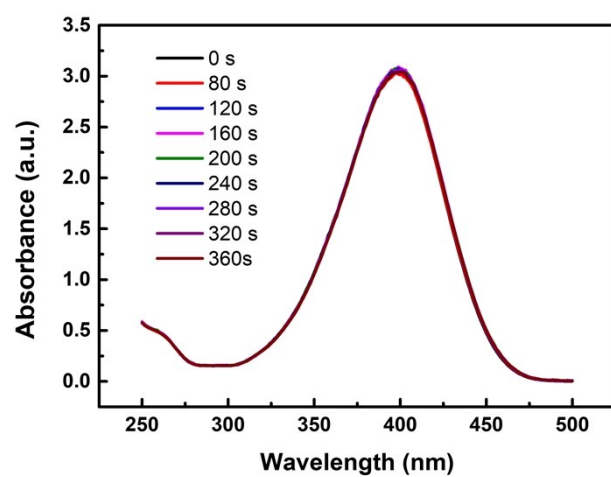

**Figure S3** Successive UV-vis spectra for the reduction reaction of 4-nitrophenol by NaBH<sub>4</sub> without any catalyst.

**Table S1.** The apparent rate constant of each cycle based on 3DGraphene/NC@Co catalyst in the seven-cycle stability test for the reduction of 4-nitrophenol to 4-aminophenol at 25 °C.

| <b>cycling number</b> | <b>apparent rate constant <math>k</math> (s<sup>-1</sup>)</b> |
|-----------------------|---------------------------------------------------------------|
| 1                     | 0.01485                                                       |
| 2                     | 0.00982                                                       |
| 3                     | 0.00879                                                       |
| 4                     | 0.00628                                                       |
| 5                     | 0.00495                                                       |
| 6                     | 0.00366                                                       |
| 7                     | 0.00226                                                       |

**Table S2.** The apparent rate constant of each cycle based on 3DGraphene/NC@Co catalyst in the seven-cycle stability test for the reduction of 4-nitrophenol to 4-aminophenol at 0 °C.

| <b>cycling number</b> | <b>apparent rate constant <math>k</math> (s<sup>-1</sup>)</b> |
|-----------------------|---------------------------------------------------------------|
| 1                     | 0.00376                                                       |
| 2                     | 0.00354                                                       |
| 3                     | 0.00351                                                       |
| 4                     | 0.00317                                                       |
| 5                     | 0.00239                                                       |
| 6                     | 0.00148                                                       |
| 7                     | 0.00117                                                       |

**Table S3.** The apparent rate constant of each cycle based on 3DGraphene/NC@Co catalyst in the seven-cycle stability test for the reduction of 4-nitrophenol to 4-aminophenol at 35 °C.

| <b>cycling number</b> | <b>apparent rate constant <math>k</math> (s<sup>-1</sup>)</b> |
|-----------------------|---------------------------------------------------------------|
| 1                     | 0.01740                                                       |
| 2                     | 0.01736                                                       |
| 3                     | 0.01710                                                       |
| 4                     | 0.01598                                                       |
| 5                     | 0.01412                                                       |
| 6                     | 0.01302                                                       |
| 7                     | 0.00891                                                       |
